# Supplementary material for: A Transcriptomic Severity Metric That Predicts Clinical Outcomes in Critically Ill Surgical Sepsis Patients
Source: PubMed Central journal article supplement — Crit Care Explor. 2021 Oct 14;3(10):e0554. doi: 10.1097/CCE.0000000000000554 (PMC8522866; doi:10.1097/cce.0000000000000554), 2021-10-14
Supplement: cc9-3-e0554-s001.pdf [file cc9-3-e0554-s001.pdf]

## 1 SUPPLEMENTAL DIGITAL CONTENT

### 2 Supplemental Methods

3 Samples were collected and processed from 335 newly adjudicated surgical sepsis  
4 patients, and blood samples were collected at <12 (n=2) and 24 hours (n=333). Upon  
5 presumption of sepsis (to be adjudicated at a later point of time), patients were transferred to the  
6 surgical ICU (if already not there) where they received implementation of evidence-based sepsis  
7 management protocols, including fluid resuscitation, broad spectrum antibiotics, and inotropes  
8 (as required). Blood lactate levels were measured every four hours. The estimated time from  
9 MEWS screening/warning to presumption of sepsis and initiation of sepsis management  
10 protocols was generally less than 4 hours.

11 Overall cohort inclusion criteria included: 1) age  $\geq 18$  years; 2) clinical diagnosis of sepsis  
12 as defined by 2001 consensus guidelines; and 3) entrance into the electronic medical record-  
13 (EMR) based sepsis clinical management protocol.<sup>1</sup> Exclusion criteria included of any of the  
14 following: 1) refractory shock (death <24 hours from sepsis protocol initiation) or inability to  
15 achieve source control (e.g., total bowel ischemic necrosis); 2) pre-admission expected lifespan  
16 <3 months; 3) patient/proxy not committed to aggressive management; 4) severe congestive  
17 heart failure (CHF) (NYHA Class IV); 5) Child-Pugh Class C liver disease or pre-liver transplant;  
18 6) known HIV with CD4<sup>+</sup> count <200 cells/mm<sup>3</sup>; 7) patients receiving chronic corticosteroids or  
19 immunosuppressive agents, including organ transplant recipients; 8) pregnancy; 9)  
20 institutionalized patients; 10) inability to obtain informed consent within 96 hours of enrollment;  
21 11) chemotherapy or radiotherapy within 30 days; 12) severe traumatic brain injury (TBI); and  
22 13) spinal cord injury (SCI) resulting in permanent sensory and/or motor deficits.

23 The IMX-BVN-2 and IMX-SEV-2 algorithms were evaluated on 335 subjects in whom  
24 whole blood RNA collections were available. Of those, 333 samples were obtained the following

25 morning after diagnosis of sepsis (T1 = 24 hours) and institution of treatment bundles. Two  
 26 samples were not available at 24 hours and were replaced with samples obtained at less than  
 27 12 hours post institution of treatment bundles. 289 samples had been stored in the original  
 28 PAXgene collection tubes, while 46 samples were stored at -80°C as isolated total cellular RNA.

29 The IMX-SEV-2™ metric was analyzed on a NanoString nCounter FLEX® using the

30

**Supplemental Table 1. List of 29 genes used in IMX-BVN-2 and IMX-SEV-2.** The scores use individual levels of mRNAs originally described in several sepsis diagnostic/prognostic modules. The mRNA modules are: (1) infection-up: *CEACAM1*, *ZDHHC19*, *C9orf95*, *GNA15*, *BATF*, *C3AR1*; (2) infection-down: *KIAA1370*, *TGFBI*, *MTCH1*, *RPGRIP1*, *HLA-DPB1*; (3) bacterial-viral-up: *HK3*, *TNIP1*, *GPAA1*, *CTSB*; (4) bacterial-viral-down: *IFI27*, *JUP*, *LAX1*; (5) mortality-up: *DEFA4*, *CD163*, *RGS1*, *PER1*, *HIF1A*, *SEPP1*, *C11orf74*, *CIT*; and (6) mortality-down: *LY86*, *TST*, *KCNJ2*.

31

analytical protocol, completed July 2020, using a standard 18-hour incubation period. The analyses were conducted at the University of Florida Department of Pathology Molecular Pathology Laboratory at the Rocky Point Laboratory of UF Health Shands Hospital. The Rocky Point Laboratory is CLIA-certified, CAP-accredited, and the samples were all run by a single ASCP-certified medical technologist. Quality control and

38 quality assurances were provided according to the analytical protocol and verified by a College  
 39 of Medicine faculty certified by the American Board of Pathology.

40 Blood samples collected in PAXgene™ Blood RNA tubes had total RNA isolated as  
 41 described in the primary manuscript, and RNA expression levels from 29 genes determined  
 42 (Department of Pathology Molecular Pathology Laboratory at Rocky Point, Shands UF Health)  
 43 (**Supplemental Table 1**). Completely blinded raw data from the NanoString nCounter FLEX®  
 44 were transferred electronically to Inflammatrix for generation of the IMX-BVN-2 and IMX-SEV-2  
 45 scores, as previously described.<sup>2-4</sup> IMX-SEV-2 was derived from transcriptomic datasets  
 46 obtained from 33 independent cohorts with a total of 3288 patients, and was validated in 348  
 47 patients, where it had an AUROC of 0.840 for predicting 30-day mortality.<sup>5</sup>

48 Diagnostic thresholds were set based on prespecified criteria so that the bacterial, viral  
 49 and severity scores would be separated into discrete interpretation bands each (**Supplemental**  
 50 **Figure 1**). The thresholds were originally set in training data targeting likelihood ratios (LRs) of  
 51 0.05 in the low bands, and 10 in the upper bands. The selected cutoffs were 0.096, 0.317, and  
 52 0.537 for the bacterial score, and 0.075, 0.288, and 0.502 for the viral score.

53

Supplemental Figure 1. Diagnostic thresholds for likelihood of a bacterial or viral infection, or 28 (30) day mortality.

**Bacterial Infection Likelihood**

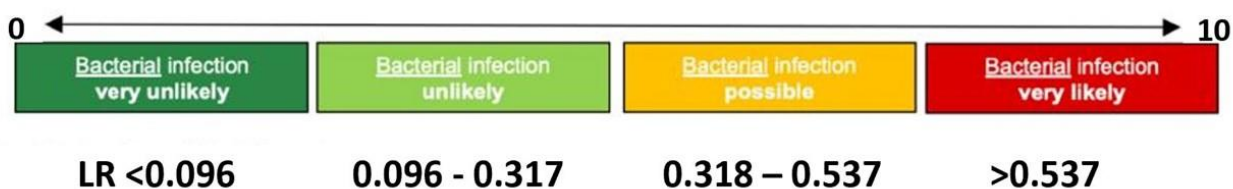

**Viral Infection Likelihood**

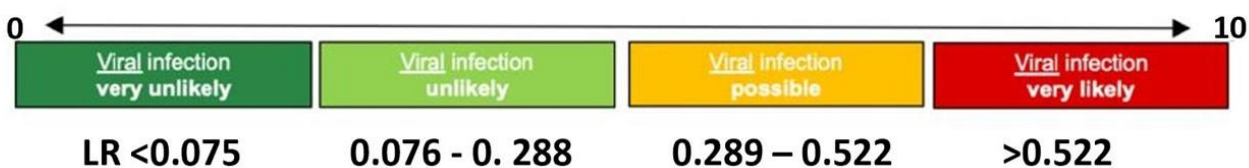

**28-day mortality / severity composite Likelihood**

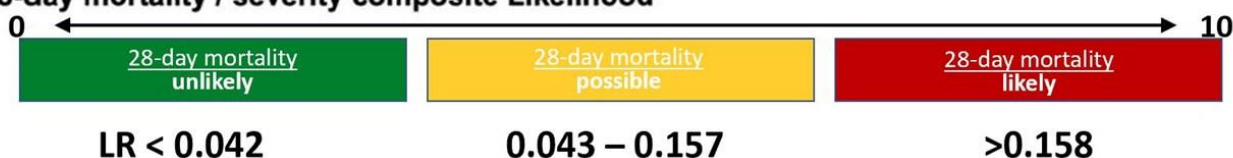

54 The primary clinical outcome variable was 30-day (all-cause) mortality. Secondary  
 55 clinical outcome variables included: 1) development or absence of chronic critical illness (CCI),  
 56 2) hospital discharge disposition, 3) presence or absence of secondary infections and 4) an  
 57 overall adverse clinical outcome. Inpatient clinical trajectory was defined as ‘early death’, ‘rapid  
 58 recovery’ (RAP), or ‘chronic critical illness’ (CCI). Early death was defined as death within 14  
 59 days of sepsis onset. CCI was defined as an ICU length of stay (LOS) greater than or equal to

60 14 days with evidence of persistent organ dysfunction based upon components of the SOFA  
 61 score.<sup>6</sup> Hospitalized patients who died after an ICU length of stay >14 days from the index  
 62 hospitalization were classified as CCI.<sup>7</sup> Rapid recovery (RAP) patients were those discharged

**Supplemental Figure 2.** Outcome overlaps among Sepsis-3 patients. Subjects were assigned to different categories based on whether they exhibited one or more adverse clinical outcomes. The definition of an adverse clinical outcome was based on subjects exhibiting one or more of these clinical outcomes.

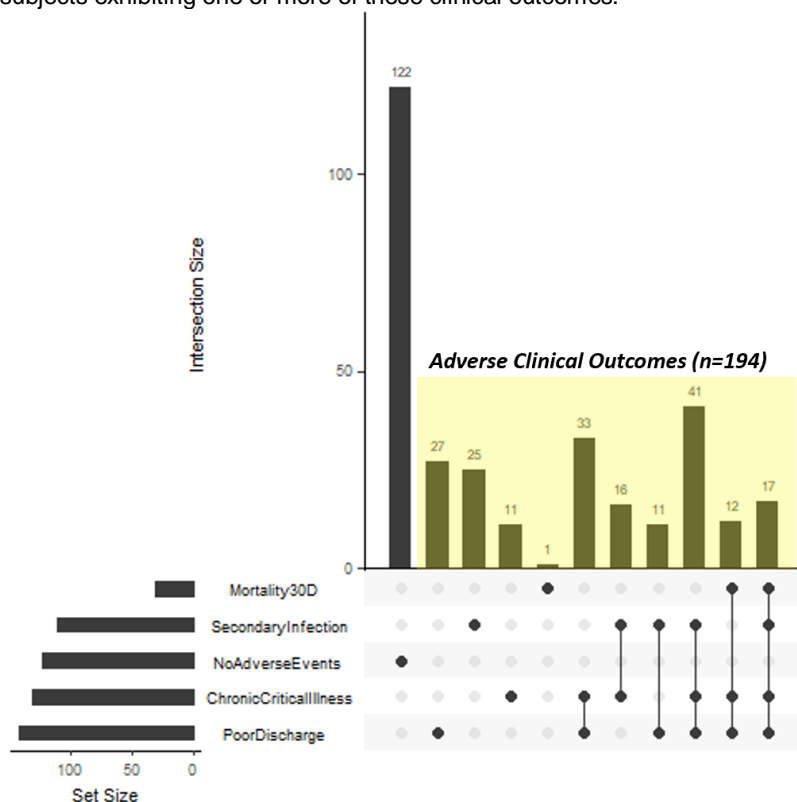

63 from the ICU within 14 days with resolution of organ dysfunction.

64 **Supplemental Figure 2** presents the distribution of Sepsis-3 patients with different  
 65 clinical outcomes. Patients were defined as having an ‘adverse clinical outcome’ if they  
 66 experienced a secondary infection, CCI, poor discharge disposition and/or mortality within the  
 67 first 30 days. Outcomes overlaps were plotted with UpSetR™ for R software  
 68 (<https://doi.org/10.1093/bioinformatics/btx364>). One hundred, twenty four Sepsis-3 patients had  
 69 no adverse clinical outcomes, while 192 patients experienced one or more adverse clinical

70 events. One hundred and three patients developed chronic critical illness (CCI) and had either  
 71 an adverse discharge disposition or death.

## 72 Supplemental Results

73

74

### Supplemental Table 2. Cohort demographics

| Characteristics                                 | Overall cohort<br>(n=335) | Sepsis-3 cohort<br>(n=316) |
|-------------------------------------------------|---------------------------|----------------------------|
| Male, n (%)                                     | 178 (53.1)                | 169 (53.5)                 |
| Age in years, median (25th, 75th)               | 62 (49, 71)               | 62 (51, 71)                |
| Race, n (%)                                     |                           |                            |
| Caucasian                                       | 299 (89.3)                | 284 (89.9)                 |
| African American                                | 32 (9.6)                  | 28 (8.9)                   |
| Other                                           | 4 (1.2)                   | 4 (1.3)                    |
| Charlson comorbidity index, median (25th, 75th) | 3 (1, 5)                  | 3 (1, 5)                   |
| Active cancer diagnosis                         | 47 (14)                   | 44 (13.9)                  |
| Reason for hospital admission, n (%)            |                           |                            |
| Active infection                                | 211 (63)                  | 199 (63)                   |
| Non-infectious complication                     | 31 (9.3)                  | 30 (9.5)                   |
| Planned surgery                                 | 59 (17.6)                 | 56 (17.7)                  |
| Trauma                                          | 34 (10.1)                 | 31 (9.8)                   |
| Inter-facility hospital transfer, n (%)         | 144 (43)                  | 136 (43)                   |
| Primary sepsis diagnosis, n (%)                 |                           |                            |
| Intra-abdominal                                 | 98 (29.3)                 | 96 (30.4)                  |
| SSI                                             | 76 (22.7)                 | 67 (21.2)                  |
| Pneumonia                                       | 56 (16.7)                 | 55 (17.4)                  |
| Urosepsis                                       | 37 (11)                   | 34 (10.8)                  |
| NSTI                                            | 40 (11.9)                 | 40 (12.7)                  |
| CLABSI                                          | 4 (1.2)                   | 4 (1.3)                    |
| Other                                           | 24 (7.2)                  | 20 (6.3)                   |
| Sepsis severity by Sepsis-2, n (%)              |                           |                            |
| Sepsis                                          | 100 (29.9)                | 81 (25.6)                  |
| Severe sepsis                                   | 145 (43.3)                | 145 (45.9)                 |
| Septic shock                                    | 90 (26.9)                 | 90 (28.5)                  |
| Sepsis severity by Sepsis-3, n (%)              |                           |                            |
| Infection                                       | 19 (5.7)                  | 0 (0)                      |
| Sepsis                                          | 235 (70.1)                | 235 (74.4)                 |
| Septic shock                                    | 81 (24.2)                 | 81 (25.6)                  |
| APACHE II, median (25th, 75th)                  | 17 (11, 23)               | 17 (12, 24)                |
| Maximum SOFA score, median (25th, 75th)         | 7 (5, 10)                 | 8 (5, 10)                  |
| Acute Kidney Injury, n (%)                      |                           |                            |
| KDIGO Stage 1                                   | 79 (23.6)                 | 78 (24.7)                  |

|                                   |            |              |
|-----------------------------------|------------|--------------|
| KDIGO Stage 2                     | 63 (18.8)  | 62 (19.6)    |
| KDIGO Stage 3                     | 45 (13.4)  | 44 (13.9)    |
| MOF, n (%)                        | 145 (43.3) | 145 (45.9)   |
| ICU LOS, median (25th, 75th)      | 7 (3, 17)  | 8 (4, 17)    |
| Hospital LOS, median (25th, 75th) | 16 (8, 26) | 16.5 (9, 27) |

75 SSI, surgical site infection; NSTI, necrotizing soft tissue infection; CLABSI, central line associated blood stream  
76 infection; APACHE II, acute physiology and chronic health evaluation 2 score assessed at 24 hours after sepsis  
77 onset; MOF, multiple organ failure; LOS, length of stay

78 **Supplemental Table 3. Secondary Infections, Length of Hospitalization, and Discharge Disposition in the Overall and**  
 79 **Sepsis-3 Cohorts.** The two cohorts are further divided into subjects who experienced an early death, rapid recovery (RAP), or  
 80 chronic critical illness (CCI).

| Outcomes                                   | Overall cohort (n=335) | Early Death (n=11) | CCI (n=120)   | RAP (n=204)    | Sepsis -3 cohort (n=316) | Early Death (n=11) | CCI (n=119) | RAP (n=186) |
|--------------------------------------------|------------------------|--------------------|---------------|----------------|--------------------------|--------------------|-------------|-------------|
| 2° infections/patient, mean (SD)           | 0.5 (0.8)              | 0.4 (0.5)          | 1 (1)         | 0.2 (0.5)      | 0.5 (0.8)                | 0.4 (0.5)          | 1 (1)       | 0.2 (0.5)   |
| 2° infections/100 hospital days, mean (SD) | 2 (3.6)                | 4.3 (7)            | 3 (3.5)       | 1.3 (3.2)      | 2.1 (3.6)                | 4.3 (7)            | 3 (3.5)     | 1.4 (3.3)   |
| ICU LOS, median (25th, 75th)               | 7 (3, 17)              | 6 (5, 9)           | 20 (15, 28.5) | 4 (2, 8)       | 8 (4, 17)                | 6 (5, 9)           | 20 (15, 29) | 5 (3, 8)    |
| Hospital LOS, median (25th, 75th)          | 16 (8, 26)             | 6 (5, 13)          | 28 (20, 40)   | 10.5 (7, 17.5) | 16.5 (9, 27)             | 6 (5, 13)          | 28 (20, 40) | 11 (8, 18)  |
| Discharge disposition, n (%)               |                        |                    |               |                |                          |                    |             |             |
| “Good” disposition                         | 193 (57.6)             | 0 (0)              | 27 (22.5)     | 166 (81.4)     | 175 (55.4)               | 0 (0)              | 27 (22.7)   | 148 (79.6)  |
| Home                                       | 66 (19.7)              | N/A                | 1 (0.8)       | 65 (31.9)      | 58 (18.4)                | 0 (0)              | 1 (0.8)     | 57 (30.6)   |
| Home healthcare services                   | 102 (30.4)             | N/A                | 15 (12.5)     | 87 (42.6)      | 93 (29.4)                | 0 (0)              | 15 (12.6)   | 78 (41.9)   |
| Inpatient rehab facility                   | 25 (7.5)               | N/A                | 11 (9.2)      | 14 (6.9)       | 24 (7.6)                 | 0 (0)              | 11 (9.2)    | 13 (7)      |
| “Poor” disposition                         | 142 (42.4)             | 11 (100)           | 93 (77.5)     | 38 (18.6)      | 141 (44.6)               | 11 (100)           | 92 (77.3)   | 38 (20.4)   |
| LTAC                                       | 52 (15.5)              | N/A                | 48 (40)       | 4 (2)          | 51 (16.1)                | 0 (0)              | 47 (39.5)   | 4 (2.2)     |
| Skilled Nursing facility                   | 44 (13.1)              | N/A                | 11 (9.2)      | 33 (16.2)      | 44 (13.9)                | 0 (0)              | 11 (9.2)    | 33 (17.7)   |
| Another Hospital                           | 13 (3.9)               | N/A                | 12 (10)       | 1 (0.5)        | 13 (4.1)                 | 0 (0)              | 12 (10.1)   | 1 (0.5)     |
| Hospice                                    | 8 (2.4)                | N/A                | 7 (5.8)       | 0 (0)          | 8 (2.5)                  | 0 (0)              | 7 (5.9)     | 0 (0)       |
| Death                                      | 26 (7.8)               | 11 (100)           | 15 (12.5)     | 0 (0)          | 26 (8.2)                 | 11 (100)           | 15 (12.6)   | 0 (0)       |

81 CCI, chronic critical illness; RAP, rapid recovery; LOS, length of stay; LTAC, long-term acute care facility. Early death, CCI and RAP percentages are  
 82 those of their respective cohort (Overall, Sepsis-3).

83 **Supplemental Table 4. Correlation Coefficients of Biochemical and Clinical Markers**  
 84 **obtained at 24 hours Post Sepsis.** For patients meeting Sepsis-3 criteria, measurements  
 85 were analyzed by Spearman's correlation tests, as appropriate. Values present *rho* value,  
 86 probability and sample size.

|                                | Transcriptomic Severity metric | APACHE II        | Charlson comorbidity index | Age              | Plasma IL-6      | Plasma CRP | ALC           | WBC           | Plasma GLP-1 |
|--------------------------------|--------------------------------|------------------|----------------------------|------------------|------------------|------------|---------------|---------------|--------------|
| Transcriptomic Severity metric | 1                              |                  |                            |                  |                  |            |               |               |              |
| ( $\rho$ )                     |                                |                  |                            |                  |                  |            |               |               |              |
| (p)                            |                                |                  |                            |                  |                  |            |               |               |              |
| (n)                            | 316                            |                  |                            |                  |                  |            |               |               |              |
| APACHE II                      | <b>0.338</b>                   | 1                |                            |                  |                  |            |               |               |              |
| ( $\rho$ )                     |                                |                  |                            |                  |                  |            |               |               |              |
| (p)                            | <b>&lt;0.0001</b>              |                  |                            |                  |                  |            |               |               |              |
| (n)                            | <b>316</b>                     | 316              |                            |                  |                  |            |               |               |              |
| Charlson comorbidity index     | 0.047                          | <b>0.347</b>     | 1                          |                  |                  |            |               |               |              |
| ( $\rho$ )                     |                                |                  |                            |                  |                  |            |               |               |              |
| (p)                            | 0.406                          | <b>&lt;.0001</b> |                            |                  |                  |            |               |               |              |
| (n)                            | 314                            | <b>314</b>       | 314                        |                  |                  |            |               |               |              |
| Age                            | 0.089                          | <i>NI</i>        | <i>NI</i>                  | 1                |                  |            |               |               |              |
| ( $\rho$ )                     |                                |                  |                            |                  |                  |            |               |               |              |
| (p)                            | 0.1126                         |                  |                            |                  |                  |            |               |               |              |
| (n)                            | 316                            |                  |                            | 316              |                  |            |               |               |              |
| Plasma IL-6                    | <b>0.432</b>                   | <b>0.243</b>     | 0.007                      | 0.075            | 1                |            |               |               |              |
| ( $\rho$ )                     |                                |                  |                            |                  |                  |            |               |               |              |
| (p)                            | <b>&lt;.0001</b>               | <b>&lt;.0001</b> | 0.8992                     | 0.1909           |                  |            |               |               |              |
| (n)                            | <b>304</b>                     | <b>304</b>       | 302                        | 304              | 304              |            |               |               |              |
| Plasma CRP                     | <b>0.173</b>                   | -0.020           | -0.123                     | -0.087           | <b>0.288</b>     | 1          |               |               |              |
| ( $\rho$ )                     |                                |                  |                            |                  |                  |            |               |               |              |
| (p)                            | <b>0.0092</b>                  | 0.7638           | 0.0658                     | 0.1938           | <b>&lt;.0001</b> |            |               |               |              |
| (n)                            | <b>226</b>                     | 226              | 224                        | 226              | <b>225</b>       | 226        |               |               |              |
| ALC                            | <b>-0.300</b>                  | <b>-0.212</b>    | -0.121                     | <b>-0.266</b>    | <b>-0.343</b>    | -0.087     | 1             |               |              |
| ( $\rho$ )                     |                                |                  |                            |                  |                  |            |               |               |              |
| (p)                            | <b>&lt;.0001</b>               | <b>0.0006</b>    | 0.054                      | <b>&lt;.0001</b> | <b>&lt;.0001</b> | 0.2371     |               |               |              |
| (n)                            | <b>255</b>                     | <b>255</b>       | 253                        | <b>255</b>       | <b>246</b>       | 188        | 255           |               |              |
| +WBC                           | <b>0.310</b>                   | <b>0.204</b>     | 0.055                      | 0.025            | 0.051            | -0.018     | <b>0.231</b>  | 1             |              |
| ( $\rho$ )                     |                                |                  |                            |                  |                  |            |               |               |              |
| (p)                            | <b>&lt;.0001</b>               | <b>0.0003</b>    | 0.3307                     | 0.6583           | 0.3791           | 0.7871     | <b>0.0002</b> |               |              |
| (n)                            | <b>314</b>                     | <b>314</b>       | 312                        | 314              | 303              | 225        | <b>255</b>    | 314           |              |
| Plasma GLP-1                   | <b>0.436</b>                   | <b>0.218</b>     | <b>0.174</b>               | <b>0.129</b>     | <b>0.379</b>     | 0.104      | <b>-0.151</b> | <b>0.160</b>  | 1            |
| ( $\rho$ )                     |                                |                  |                            |                  |                  |            |               |               |              |
| (p)                            | <b>&lt;.0001</b>               | <b>0.0001</b>    | <b>0.0025</b>              | <b>0.0247</b>    | <b>&lt;.0001</b> | 0.1204     | <b>0.018</b>  | <b>0.0053</b> |              |
| (n)                            | <b>304</b>                     | <b>304</b>       | <b>302</b>                 | <b>304</b>       | <b>303</b>       | 225        | <b>246</b>    | <b>303</b>    | 304          |

87  $\rho$ , Spearman correlation coefficient; p, p-value; n, number of available patients for analysis.

88 ALC, absolute lymphocyte count; CRP, c-reactive protein; WBC, total white blood cell count; GLP-1, glucagon-like peptide-1. *NI*, not independent variables since the Charlson comorbidity index and APACHE II contain age as a component.

89  
90



91

92 *Likelihood of a Viral Infection.* None of the patients were clinically adjudicated to have a  
 93 viral infection. Routine viral DNA or antigen titers were not performed unless clinically justified,  
 94 and none of the patients were considered to have a concurrent viral infection. Expectedly, the  
 95 IMX-BVN-2 metric identified 333 of 335 subjects as being either ‘Unlikely’ or ‘Very Unlikely’.  
 96 Only four subjects were deemed to have a ‘Possible’ or ‘Very Likely’ chance of having a viral  
 97 infection (**Supplemental Table 5**). Since viral DNA or antigen titers were not conducted on any

**Supplemental Table 5. Distribution of IMX-BVN-2 Viral Infection Scores.**

| IMX-BVN-2 Viral Band<br>→        | Very likely | Possible | Unlikely | Very unlikely | Total |
|----------------------------------|-------------|----------|----------|---------------|-------|
| All patients (assumed non-viral) | 2 (1%)      | 2 (1%)   | 32 (10%) | 299 (89%)     | 335   |

patient, it is impossible to determine whether a subclinical viral infection (or viral reactivation in the

102 setting of critical illness) was present in these four patients with possible or very likely scores.

103 *Likelihood of a Bacterial Infection.* Importantly, this study was not designed to identify  
 104 whether the metric could predict whether the patients had or did not have a bacterial infection  
 105 (**Supplemental Table 6**). All of the patients were clinically adjudicated to have a microbial  
 106 infection, either bacterial or fungal at the time of initiation of the sepsis management bundles.  
 107 In addition, all of the patients had received broad spectrum antibiotics upon initiation of sepsis  
 108 management bundles. In most cases, this was initiated 12-18 hours prior to blood sampling. At

**Supplemental Table 6. Distribution of IMX-BVN-2 Bacterial Infection Scores.**

| IMX-BVN-2 Bacterial Band<br>→ | Very likely | Possible | Unlikely | Very unlikely | Total |
|-------------------------------|-------------|----------|----------|---------------|-------|
| Fungal infection              | 7 (78%)     | 2 (22%)  | 0 (0%)   | 0 (0%)        | 9     |
| Bacterial infection           | 258 (79%)   | 63 (19%) | 5 (2%)   | 0 (0%)        | 326   |

the time the study sample was collected, blood or exudate samples were not collected, so it would not be possible to determine how many of these subjects

115 would still be infected, or the temporal dynamics of the IMX-BVN-2 score with regard to pre/post  
116 antibiotics timing.

117 The IMX-BVN-2 metric identified both adjudicated fungal and bacterial infections as  
118 being 'Very Likely' or 'Possible' bacterial infections. Only 5 of the 335 included subjects were  
119 scored to be "Unlikely" whereas both the subjects with bacterial and fungal infections had close  
120 to 80% being very likely and nearly 20% as possible.

121

122

123

- 124 1. Moore LJ, Turner KL, Todd SR, McKinley B, Moore FA. Computerized clinical decision  
125 support improves mortality in intra abdominal surgical sepsis. *American journal of*  
126 *surgery*. 2010;200(6):839-843; discussion 843-834.
- 127 2. Mayhew MB, Buturovic L, Luethy R, et al. A generalizable 29-mRNA neural-network  
128 classifier for acute bacterial and viral infections. *Nat Commun*. 2020;11(1):1177.
- 129 3. Safarika A, Wacker JW, Katsaros K, et al. A 29-mRNA Host Response Test from Blood  
130 Accurately Distinguishes Bacterial and Viral Infections Among Emergency Department  
131 Patients. *medRxiv*. 2020:2020.2012.2001.20242321.
- 132 4. Bauer W, Kappert K, Galtung N, et al. A novel 29-mRNA host response assay from  
133 whole blood accurately identifies bacterial and viral infections in patients presenting to  
134 the emergency department with suspected infections: A prospective observational  
135 study. *Critical care medicine*. 2021.
- 136 5. Sweeney TE, Perumal TM, Henao R, et al. A community approach to mortality prediction  
137 in sepsis via gene expression analysis. *Nat Commun*. 2018;9(1):694.
- 138 6. Seymour CW, Liu VX, Iwashyna TJ, et al. Assessment of Clinical Criteria for Sepsis: For  
139 the Third International Consensus Definitions for Sepsis and Septic Shock (Sepsis-3).  
140 *Jama*. 2016;315(8):762-774.
- 141 7. Brakenridge SC, Efron PA, Cox MC, et al. Current Epidemiology of Surgical Sepsis:  
142 Discordance Between Inpatient Mortality and 1-year Outcomes. *Annals of surgery*.  
143 2019;270(3):502-510.

144
